# Supplementary material for: An improved method for mobile characterisation of δ 13 CH 4 source signatures and its application in Germany
Source: Copernicus journal article supplement (doi:10.5194/amt-12-1123-2019), 2019-02-22
Supplement: Supplementary file 1 [file amt-12-1123-2019-supplement.pdf]

Supplement of Atmos. Meas. Tech., 12, 1123–1139, 2019  
<https://doi.org/10.5194/amt-12-1123-2019-supplement>  
© Author(s) 2019. This work is distributed under  
the Creative Commons Attribution 4.0 License.

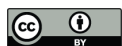

*Supplement of*

## **An improved method for mobile characterisation of $\delta^{13}\text{CH}_4$ source signatures and its application in Germany**

**Antje Hoheisel et al.**

*Correspondence to:* Antje Hoheisel ([antje.hoheisel@iup.uni-heidelberg.de](mailto:antje.hoheisel@iup.uni-heidelberg.de))

The copyright of individual parts of the supplement might differ from the CC BY 4.0 License.

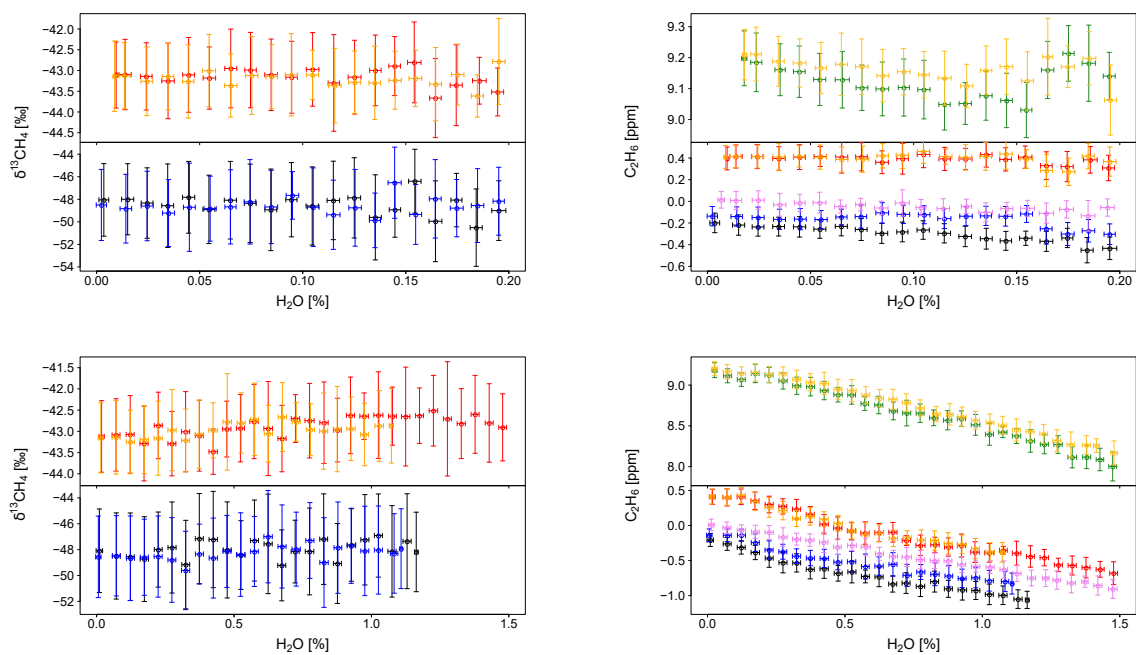

**Figure S1.** H<sub>2</sub>O interference on  $\delta^{13}\text{CH}_4$  and C<sub>2</sub>H<sub>6</sub>. Different colours indicate different tests and in part different gas cylinders used.

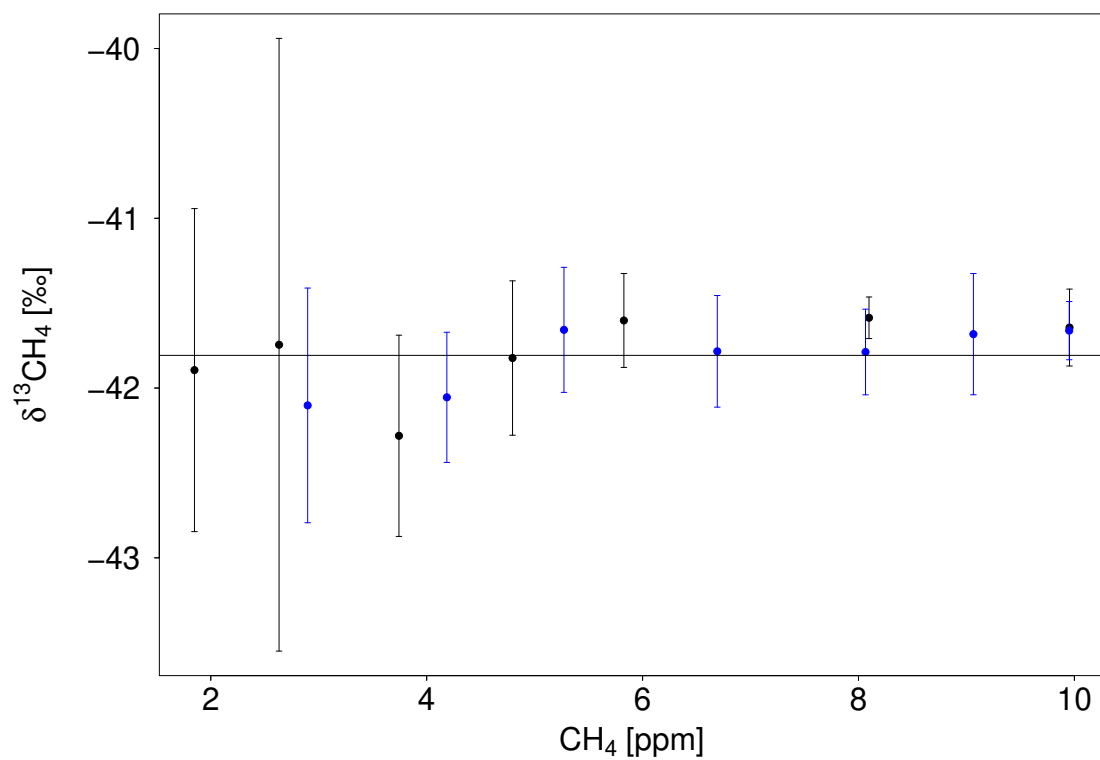

**Figure S2.** CH<sub>4</sub> interference on δ<sup>13</sup>CH<sub>4</sub>. The points show the 15 min average measurement of different gas mixtures prepared with natural air (N<sub>2</sub>, O<sub>2</sub> and Ar) and dry compressed air of 10ppm CH<sub>4</sub> (in N<sub>2</sub>, O<sub>2</sub> and Ar). The same dilution test was done twice (blue and black points).

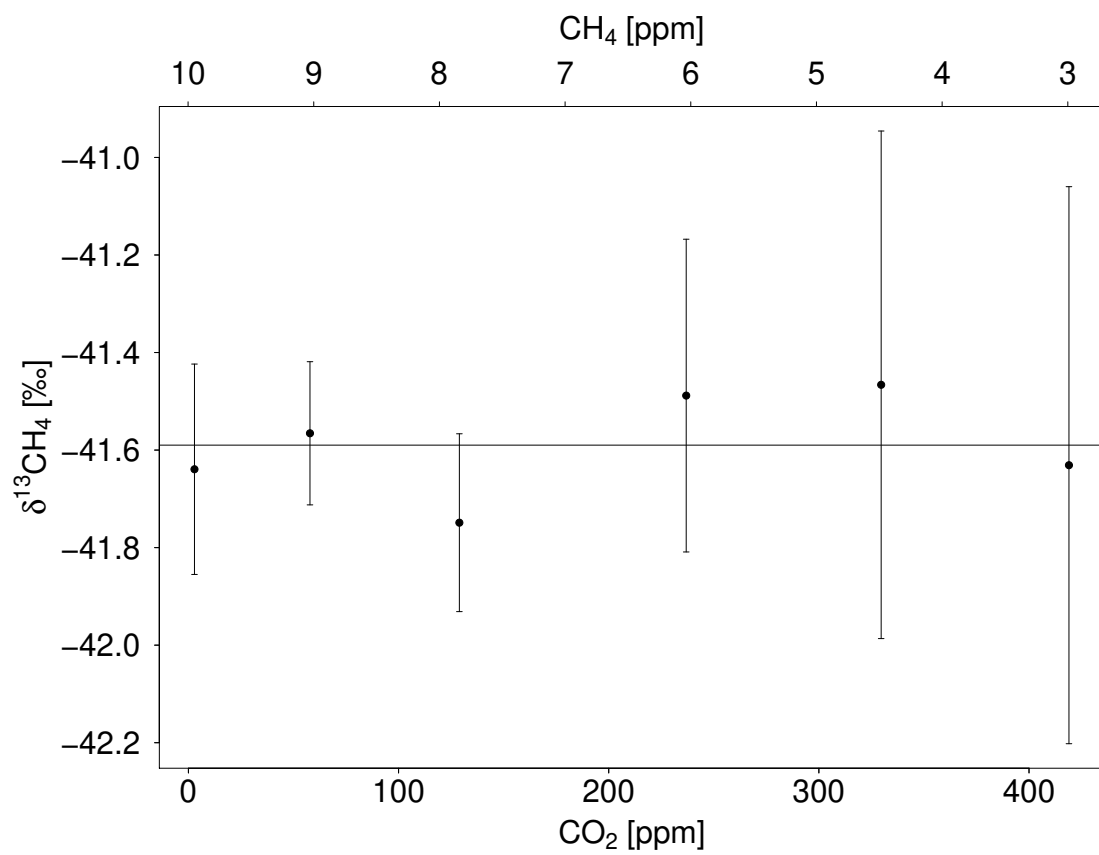

**Figure S3.** CO<sub>2</sub> interference on  $\delta^{13}\text{CH}_4$ . The points show the 15 min average measurement of different gas mixtures prepared by a dilution test with dry compressed air of 10 ppm CH<sub>4</sub> (in N<sub>2</sub>, O<sub>2</sub> and Ar) and dry compressed air of 600 ppm CO<sub>2</sub> (in N<sub>2</sub>, O<sub>2</sub> and Ar).

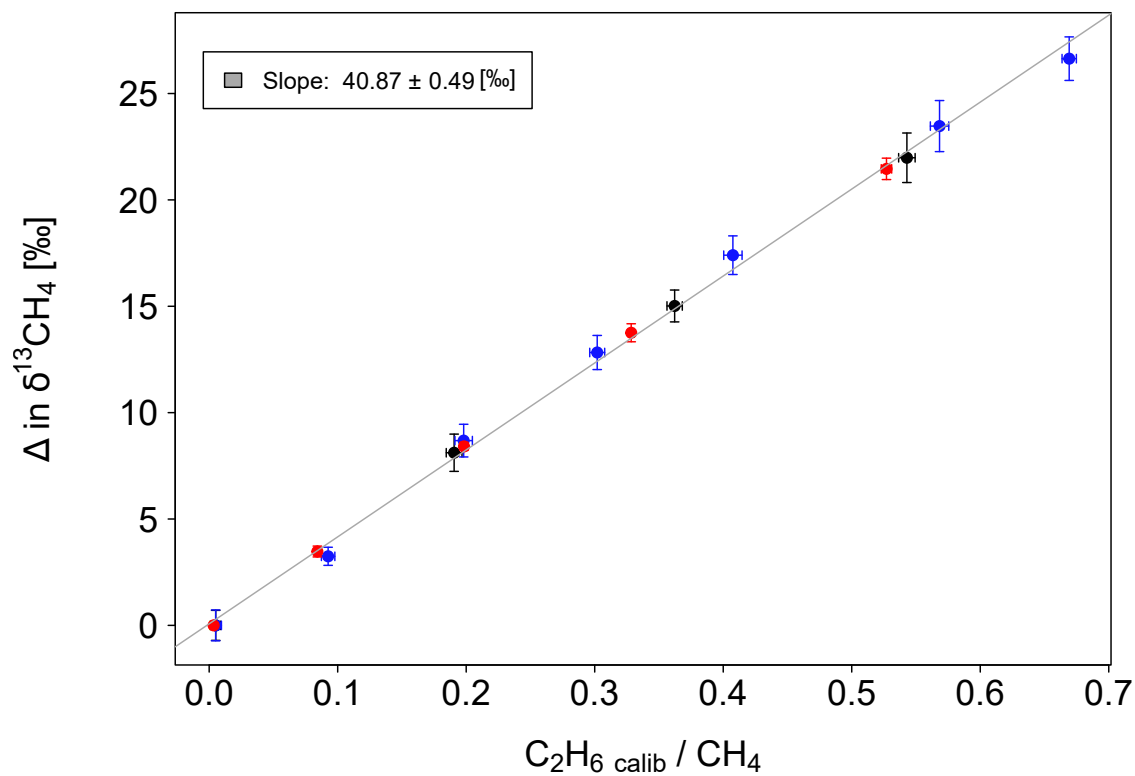

**Figure S4.**  $C_2H_6$  interference on  $\delta^{13}CH_4$ . The points show the corrected and calibrated 15 min average of different gas mixtures prepared by three dilution test with dry compressed air of 5 ppm  $C_2H_6$  (in  $N_2$ ,  $O_2$  and Ar) and dry compressed air of 10 ppm  $CH_4$  (in  $N_2$ ,  $O_2$  and Ar, red) or atmospheric concentrations (black and blue).

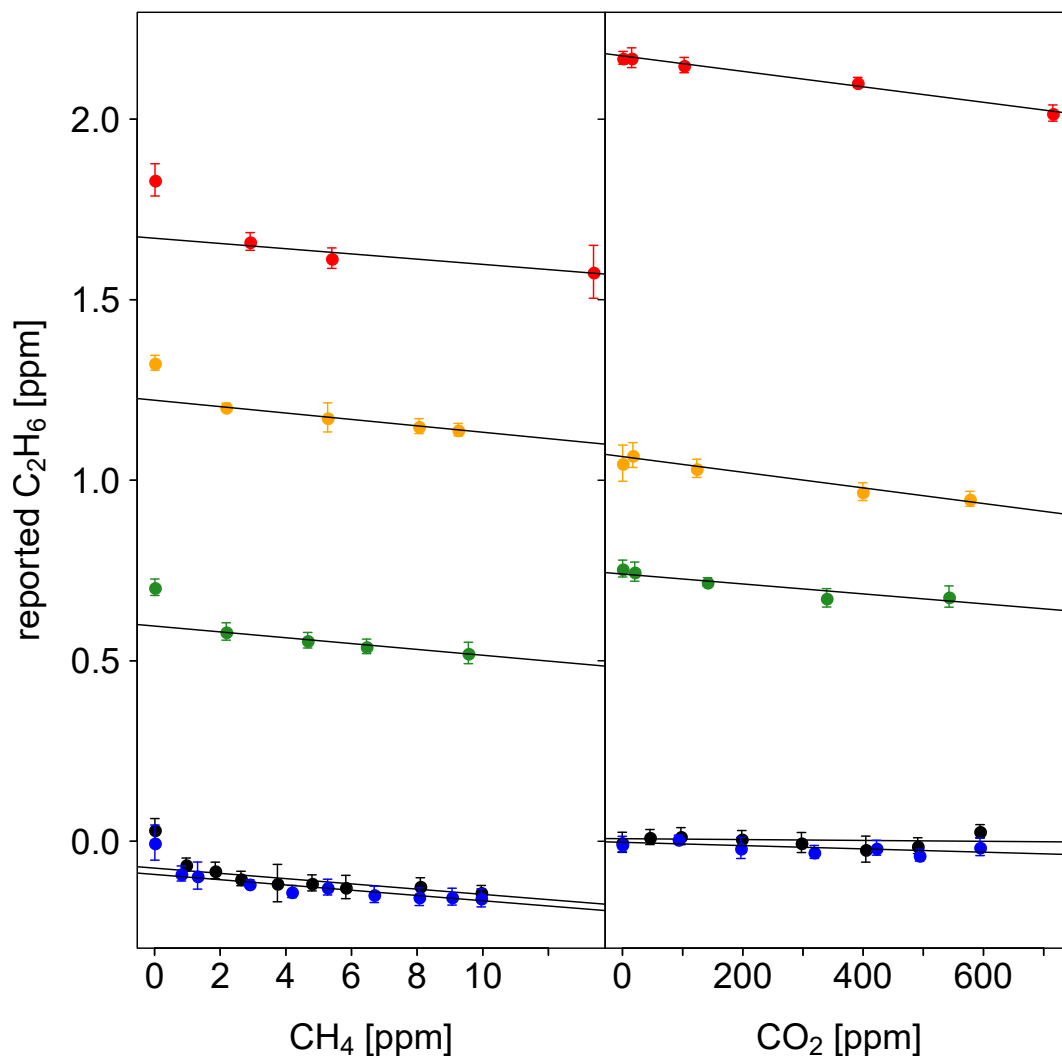

**Figure S5.**  $CH_4$  and  $CO_2$  interference on  $C_2H_6$ . The points show the reported 10–15 min average of different gas mixture. The blue and black points show four dilution test with natural air ( $N_2$ ,  $O_2$  and Ar) and dry compressed air of 10ppm  $CH_4$  (in  $N_2$ ,  $O_2$  and Ar, red) or 600ppm  $CO_2$  (in  $N_2$ ,  $O_2$  and Ar). The red, yellow and green measurements show injection tests at which different amounts of pure  $CH_4$  or  $CO_2$  were injected into three liter sample bags filled with natural air ( $N_2$ ,  $O_2$  and Ar) and different amounts of  $C_2H_6$ .

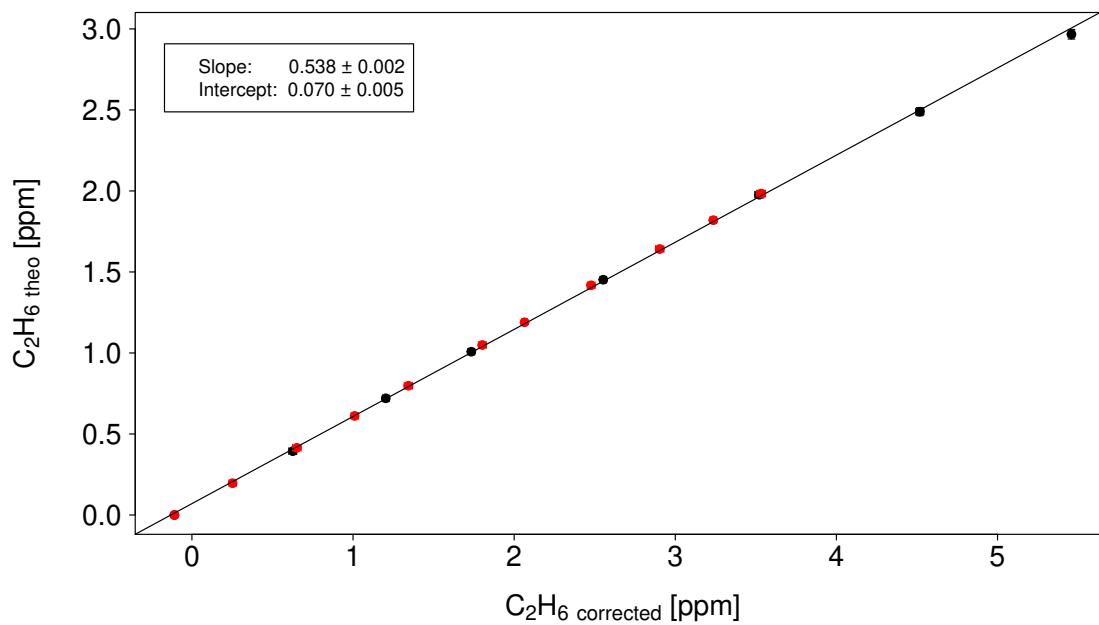

**Figure S6.** Linearity test of  $C_2H_6$ . The points (black and red) show the corrected 10–15 min average of different gas mixture prepared by two dilution tests with dry compressed air of atmospheric concentrations and dry compressed air of 5 ppm  $C_2H_6$  (in  $N_2$ ,  $O_2$  and Ar). The theoretical  $C_2H_6$  concentrations were calculated using the measured  $CH_4$  and  $CO_2$  concentrations in the gas mixture and the known  $CO_2$ ,  $CH_4$  and  $C_2H_6$  concentrations of the used gas cylinders.

**Table S1.**  $\delta^{13}\text{CH}_4$  signatures determined for each AirCore measurement.

| location                            | date       | $\delta^{13}\text{CH}_4$ [‰] | $r^2$ | peak height above baseline |
|-------------------------------------|------------|------------------------------|-------|----------------------------|
| <b>biogas plant</b>                 |            |                              |       |                            |
| Heidelberg                          | 2016-08-29 | $-62.69 \pm 1.05$            | 0.939 | 2.59                       |
|                                     | 2016-09-08 | $-62.04 \pm 0.20$            | 0.999 | 9.45                       |
|                                     | 2016-09-08 | $-61.23 \pm 0.60$            | 0.994 | 4.85                       |
|                                     | 2016-09-28 | $-58.96 \pm 0.57$            | 0.992 | 8.15                       |
|                                     | 2016-09-28 | $-61.89 \pm 0.32$            | 0.997 | 7.39                       |
|                                     | 2016-09-28 | $-59.81 \pm 1.03$            | 0.959 | 2.34                       |
|                                     | 2016-10-10 | $-64.16 \pm 0.44$            | 0.996 | 7.34                       |
|                                     | 2016-10-10 | $-63.66 \pm 1.06$            | 0.992 | 3.77                       |
|                                     | 2016-11-30 | $-63.15 \pm 0.58$            | 0.995 | 6.70                       |
|                                     | 2016-11-30 | $-63.11 \pm 0.97$            | 0.993 | 3.76                       |
|                                     | 2016-11-30 | $-63.46 \pm 0.74$            | 0.993 | 4.44                       |
|                                     | 2016-12-19 | $-61.99 \pm 3.25$            | 0.932 | 1.27                       |
|                                     | 2016-12-19 | $-62.11 \pm 1.33$            | 0.984 | 2.55                       |
|                                     | 2017-02-22 | $-67.43 \pm 1.26$            | 0.995 | 4.02                       |
|                                     | 2017-02-22 | $-63.58 \pm 0.84$            | 0.987 | 3.64                       |
|                                     | 2017-02-22 | $-60.85 \pm 0.95$            | 0.981 | 2.85                       |
|                                     | 2017-02-22 | $-61.12 \pm 1.63$            | 0.965 | 3.55                       |
| <b>dairy farm</b>                   |            |                              |       |                            |
| Weinheim (on farm)                  | 2016-10-26 | $-64.92 \pm 0.71$            | 0.994 | 6.32                       |
|                                     | 2016-10-26 | $-62.62 \pm 0.52$            | 0.996 | 6.67                       |
|                                     | 2016-11-21 | $-65.99 \pm 0.98$            | 0.950 | 5.28                       |
| Weinheim (plume with biogas plant)  | 2016-09-29 | $-62.58 \pm 2.08$            | 0.936 | 1.61                       |
|                                     | 2016-09-29 | $-60.16 \pm 2.09$            | 0.970 | 2.09                       |
|                                     | 2016-09-29 | $-59.59 \pm 1.59$            | 0.965 | 2.44                       |
|                                     | 2016-10-26 | $-56.58 \pm 1.20$            | 0.972 | 2.95                       |
|                                     | 2016-10-26 | $-59.66 \pm 0.14$            | 0.999 | 10.91                      |
|                                     | 2016-11-21 | $-60.43 \pm 0.85$            | 0.990 | 4.08                       |
|                                     | 2016-12-14 | $-47.17 \pm 0.25$            | 0.998 | 10.83                      |
|                                     | 2016-12-14 | $-43.13 \pm 1.15$            | 0.986 | 4.19                       |
|                                     | 2017-02-23 | $-47.18 \pm 2.82$            | 0.950 | 1.90                       |
|                                     | 2017-02-23 | $-43.64 \pm 1.55$            | 0.988 | 3.57                       |
| Ladenburg (on farm)                 | 2016-10-26 | $-64.00 \pm 2.63$            | 0.981 | 1.97                       |
|                                     | 2016-10-26 | $-61.56 \pm 2.51$            | 0.955 | 1.56                       |
|                                     | 2016-10-26 | $-63.93 \pm 0.88$            | 0.990 | 4.69                       |
| Ladenburg (plume with biogas plant) | 2016-11-30 | $-40.30 \pm 0.42$            | 0.986 | 5.95                       |
|                                     | 2016-11-30 | $-40.36 \pm 0.59$            | 0.974 | 5.45                       |
|                                     | 2016-11-30 | $-41.77 \pm 0.93$            | 0.968 | 5.09                       |
|                                     | 2016-11-30 | $-55.08 \pm 1.48$            | 0.718 | 1.74                       |
| Kleve (organic farming)             | 2017-03-24 | $-63.77 \pm 0.42$            | 0.997 | 8.45                       |
|                                     | 2017-03-24 | $-65.11 \pm 1.75$            | 0.979 | 2.86                       |
| Kleve (conventional farming)        | 2017-03-24 | $-65.37 \pm 0.42$            | 0.998 | 8.04                       |
|                                     | 2017-03-24 | $-63.30 \pm 0.18$            | 0.998 | 11.20                      |
| Kleve (plume)                       | 2017-03-24 | $-61.65 \pm 1.67$            | 0.976 | 2.70                       |



**Table S1.**  $\delta^{13}\text{CH}_4$  signatures determined for each AirCore measurement.

| location                         | date              | $\delta^{13}\text{CH}_4$ [‰] | $r^2$ | peak height<br>above baseline |
|----------------------------------|-------------------|------------------------------|-------|-------------------------------|
| <b>landfill</b>                  |                   |                              |       |                               |
| Sinsheim (plume)                 | 2016-08-29        | $-54.16 \pm 4.45$            | 0.470 | 0.47                          |
|                                  | 2016-09-08        | $-62.19 \pm 4.36$            | 0.582 | 0.54                          |
|                                  | 2016-11-02        | $-59.56 \pm 4.99$            | 0.498 | 0.46                          |
| Sinsheim (on landfill)           | 2016-11-30        | $-58.96 \pm 4.63$            | 0.523 | 0.50                          |
|                                  | 2017-07-18        | $-59.12 \pm 1.14$            | 0.992 | 4.86                          |
|                                  | 2017-07-18        | $-59.87 \pm 2.80$            | 0.947 | 1.77                          |
|                                  | 2016-07-25        | $-64.86 \pm 0.97$            | 0.987 | 3.42                          |
|                                  | 2016-07-25        | $-67.68 \pm 2.86$            | 0.914 | 0.93                          |
|                                  | 2016-07-25        | $-69.30 \pm 2.99$            | 0.850 | 0.94                          |
|                                  | 2016-07-25        | $-63.99 \pm 4.64$            | 0.606 | 0.47                          |
| <b>WWTP</b>                      |                   |                              |       |                               |
| Heidelberg                       | 2016-10-10        | $-50.80 \pm 2.28$            | 0.935 | 1.65                          |
|                                  | 2016-10-26        | $-51.17 \pm 3.97$            | 0.823 | 1.29                          |
|                                  | 2016-10-26        | $-56.34 \pm 1.20$            | 0.988 | 3.85                          |
|                                  | 2016-12-14        | $-51.97 \pm 1.41$            | 0.977 | 3.28                          |
|                                  | 2016-12-19        | $-54.21 \pm 2.31$            | 0.960 | 1.75                          |
|                                  | 2017-02-22        | $-54.22 \pm 2.41$            | 0.930 | 2.04                          |
|                                  | 2017-02-22        | $-49.40 \pm 2.78$            | 0.837 | 1.63                          |
| <b>natural gas facilities</b>    |                   |                              |       |                               |
| Sandhausen                       | 2016-11-02        | $-42.14 \pm 0.59$            | 0.994 | 7.58                          |
|                                  | 2016-11-02        | $-41.50 \pm 1.00$            | 0.967 | 3.05                          |
|                                  | 2017-03-09        | $-49.16 \pm 4.58$            | 0.810 | 1.00                          |
| Hähnlein/Gernsheim               | 2016-09-29        | $-41.14 \pm 1.40$            | 0.980 | 2.87                          |
|                                  | 2016-10-26        | $-57.45 \pm 2.69$            | 0.922 | 1.31                          |
|                                  | 2016-11-21        | $-51.04 \pm 4.00$            | 0.841 | 1.20                          |
|                                  | 2016-11-21        | $-47.60 \pm 3.67$            | 0.938 | 1.63                          |
|                                  | 2016-11-21        | $-44.49 \pm 1.69$            | 0.957 | 2.86                          |
|                                  | 2016-11-21        | $-47.35 \pm 2.95$            | 0.894 | 1.74                          |
|                                  | 2016-11-21        | $-51.00 \pm 1.03$            | 0.994 | 5.49                          |
| 2016-12-14                       | $-45.11 \pm 1.70$ | 0.973                        | 2.97  |                               |
| 2017-02-23                       | $-41.11 \pm 3.08$ | 0.851                        | 1.38  |                               |
| <b>bituminous deep coal mine</b> |                   |                              |       |                               |
| Bottrop (active)                 | 2017-03-25        | $-59.53 \pm 2.18$            | 0.947 | 1.35                          |
|                                  | 2017-03-25        | $-54.73 \pm 2.28$            | 0.928 | 1.46                          |
|                                  | 2017-03-25        | $-55.04 \pm 1.25$            | 0.972 | 2.29                          |
|                                  | 2017-03-25        | $-54.86 \pm 0.51$            | 0.996 | 5.52                          |
| Bottrop (closed)                 | 2017-03-25        | $-49.97 \pm 6.33$            | 0.677 | 0.55                          |
